# Supplementary material
Source: publisher site journal article supplement (https://www.dovepress.com/article/415200)
Supplement: Supplementary file 1 [file get_supplementary_file.php]

**Supplementary Table 1.** Antibiotic profile of *Enterobacteriaceae* isolated from patients with positive blood

culture.

| **Antibiotic Discs** | | ***Escherichia* N=40** | | | ***Klebsiella* N=35** | | | ***Raoutella* N=3** | | | ***Salmonella* N=1** | | | ***Proteus* N=4** | | | ***Enterobacter* N=2** | | | |
| --- | --- | --- | --- | --- | --- | --- | --- | --- | --- | --- | --- | --- | --- | --- | --- | --- | --- | --- | --- | --- |
|  | | R | I | S | R | I | S | R | I | S | R | I | S | R | I | S | R | I | S |
| **Amikacin** | No. | 11 | 4 | 25 | 14 | 6 | 15 | 0 | 1 | 2 | 1 | 0 | 0 | 1 | 2 | 1 | 1 | 1 | 0 |
| % | 27.5 | 10 | 62.5 | 40 | 17.1 | 31.4 | 0 | 33.3 | 66.6 | 100 | 0 | 0 | 25 | 50 | 25 | 50 | 50 | 0 |
| **Gentamycin** | No. | 16 | 6 | 18 | 21 | 3 | 11 | 1 | 0 | 2 | 1 | 0 | 0 | 2 | 0 | 2 | 1 | 0 | 1 |
| % | 40 | 15 | 45 | 60 | 8.57 | 31.4 | 33.3 | 0 | 66.6 | 100 | 0 | 0 | 50 | 0 | 50 | 50 | 0 | 50 |
| **Ceftriaxone** | No. | 25 | 4 | 11 | 31 | 2 | 2 | 3 | 0 | 0 | 0 | 0 | 1 | 4 | 0 | 0 | 2 | 0 | 0 |
| % | 62.5 | 10 | 27.5 | 88.57 | 5.71 | 5.71 | 100 | 0 | 0 | 0 | 0 | 100 | 100 | 0 | 0 | 100 | 0 | 0 |
| **Cefotaxime** | No. | 29 | 2 | 9 | 29 | 3 | 3 | 3 | 0 | 0 | 1 | 0 | 0 | 3 | 1 | 0 | 2 | 0 | 0 |
| % | 72.5 | 5 | 22.5 | 82.8 | 8.57 | 8.57 | 100 | 0 | 0 | 100 | 0 | 0 | 75 | 25 | 0 | 100 | 0 | 0 |
| **Ceftazidime** | No. | 28 | 4 | 8 | 29 | 4 | 2 | 2 | 0 | 1 | 0 | 0 | 1 | 2 | 0 | 2 | 2 | 0 | 0 |
| % | 70 | 10 | 20 | 82.8 | 11.4 | 5.71 | 66.6 | 0 | 33.3 | 0 | 0 | 100 | 50 | 0 | 50 | 100 | 0 | 0 |
| **Azteronam** | No. | 11 | 4 | 25 | 17 | 1 | 17 | 2 | 0 | 1 | 0 | 0 | 1 | 2 | 0 | 2 | 1 | 0 | 1 |
| % | 27.5 | 10 | 62.5 | 48.5 | 2.86 | 48.5 | 66.6 | 0 | 33.3 | 0 | 0 | 100 | 50 | 0 | 50 | 50 | 0 | 50 |
| **Cefipime** | No. | 8 | 2 | 30 | 13 | 3 | 19 | 1 | 0 | 2 | 0 | 0 | 1 | 1 | 0 | 3 | 0 | 0 | 2 |
| % | 20 | 5 | 75 | 37.1 | 8.57 | 54.2 | 33.3 | 0 | 66.6 | 0 | 0 | 100 | 25 | 0 | 75 | 0 | 0 | 100 |
| **Imipenem** | No. | 9 | 11 | 20 | 15 | 14 | 6 | 3 | 0 | 0 | 0 | 0 | 1 | 1 | 0 | 3 | 1 | 0 | 1 |
| % | 22.5 | 27.5 | 50 | 42.85 | 40 | 17.1 | 100 | 0 | 0 | 0 | 0 | 100 | 25 | 0 | 75 | 50 | 0 | 50 |
| **Meropenem** | No. | 10 | 10 | 20 | 11 | 14 | 10 | 1 | 1 | 1 | 0 | 0 | 1 | 1 | 0 | 3 | 1 | 1 | 0 |
| % | 25 | 25 | 50 | 31.42 | 40 | 28.6 | 33.3 | 33.3 | 33.3 | 0 | 0 | 100 | 25 | 0 | 75 | 50 | 50 | 0 |
| **Piperacillin/Tazobactam** | No. | 17 | 11 | 12 | 13 | 18 | 4 | 1 | 2 | 0 | 0 | 0 | 1 | 1 | 1 | 2 | 1 | 0 | 1 |
| % | 42.5 | 27.5 | 30 | 37.1 | 51.4 | 11.4 | 33.3 | 66.6 | 0 | 0 | 0 | 100 | 25 | 25 | 50 | 50 | 0 | 50 |
| **Amoxicillin-Clavulanate** | No. | 31 | 0 | 9 | 22 | 1 | 12 | 3 | 0 | 0 | 0 | 0 | 1 | 2 | 1 | 1 | 2 | 0 | 0 |
| % | 77.5 | 0 | 22.5 | 62.8 | 2.86 | 34.2 | 100 | 0 | 0 | 0 | 0 | 100 | 50 | 25 | 25 | 100 | 0 | 0 |
| **Ceftazidime-avibactam** | No. | 6 | 0 | 34 | 4 | 4 | 27 | 0 | 0 | 3 | 1 | 0 | 0 | 1 | 0 | 3 | 1 | 0 | 1 |
| % | 15 | 0 | 85 | 11.4 | 11.4 | 77.1 | 0 | 0 | 100 | 100 | 0 | 0 | 25 | 0 | 75 | 50 | 0 | 50 |
| **Colistin** | No. | 4 | 0 | 36 | 5 | 0 | 30 | 1 | 0 | 2 | 0 | 0 | 1 | 2 | 0 | 2 | 1 | 0 | 1 |
| % | 10 | 0 | 90 | 14.3 | 0 | 85.7 | 33.3 | 0 | 66.7 | 0 | 0 | 100 | 50 | 0 | 50 | 50 | 0 | 50 |
| **Trimethoprim sulfamethoxazole** | No. | 24 | 5 | 11 | 20 | 10 | 5 | 1 | 0 | 2 | 0 | 0 | 1 | 3 | 0 | 1 | 2 | 0 | 0 |
| % | 60 | 12.5 | 27.5 | 57.1 | 28.6 | 14.3 | 33.3 | 0 | 66.7 | 0 | 0 | 100 | 75 | 0 | 25 | 100 | 0 | 0 |
| **Ciprofloxacin** | No. | 17 | 5 | 18 | 24 | 3 | 8 | 0 | 0 | 3 | 0 | 0 | 1 | 2 | 0 | 2 | 2 | 0 | 0 |
| % | 42.5 | 12.5 | 45 | 68.6 | 8.6 | 22.9 | 0 | 0 | 100 | 0 | 0 | 100 | 50 | 0 | 50 | 100 | 0 | 0 |
| **Levofloxacin** | No. | 14 | 13 | 13 | 18 | 11 | 6 | 2 | 0 | 1 | 0 | 0 | 1 | 2 | 1 | 1 | 1 | 1 | 0 |
| % | 35 | 32.5 | 32.5 | 51.4 | 31.4 | 17.1 | 66.7 | 0 | 33.3 | 0 | 0 | 100 | 50 | 25 | 25 | 50 | 50 | 0 |
| **Tigecycline** | No. | 17 | 0 | 23 | 18 | 0 | 17 | 2 | 0 | 1 | 0 | 0 | 1 | 1 | 1 | 2 | 1 | 0 | 1 |
| % | 42.5 | 0 | 57.5 | 51.4 | 0 | 48.6 | 66.7 | 0 | 33.3 | 0 | 0 | 100 | 25 | 25 | 50 | 50 | 0 | 50 |

**Supplementary Table 2.** Antibiotic profile of non-fermenter isolated from patients with positive blood culture.

| **Antibiotic Discs** |  | ***Pseudomonas* N=40** | | | ***Acinetobacter* N=33** | | | ***Stenotrophomonas* N=1** | | | ***Burkholderia* N=2** | | | ***Acaligenes* N=1** | | |
| --- | --- | --- | --- | --- | --- | --- | --- | --- | --- | --- | --- | --- | --- | --- | --- | --- |
|  |  | **R** | **I** | **S** | **R** | **I** | **S** | R | I | S | R | I | S | R | I | S |
| **Amikacin** | **No.** | 19 | 4 | 17 | 24 | 1 | 8 | 1c | 0 | 0 | 2 | 0 | 0 | 0 | 0 | 1 |
| **%** | 47.5 | 10 | 42.5 | 72.73 | 3.03 | 24.24 | 100 | 0 | 0 | 100 | 0 | 0 | 0 | 0 | 100 |
| **Gentamycin** | **No.** | 18 | 9 | 13 | 24 | 2 | 7 | 1 | 0 | 0 | 2 | 0 | 0 | 0 | 0 | 1 |
| **%** | 45 | 22.5 | 32.5 | 72.73 | 6.06 | 21.21 | 100 | 0 | 0 | 100 | 0 | 0 | 0 | 0 | 100 |
| **Ceftriaxone** | **No.** | 27 | 4 | 9 | 26 | 0 | 7 | 1 | 0 | 0 | 2 | 0 | 0 | 1 | 0 | 0 |
| **%** | 67.5 | 10 | 22.5 | 78.79 | 0 | 21.21 | 100 | 0 | 0 | 100 | 0 | 0 | 100 | 0 | 0 |
| **Cefotaxime** | **No.** | 25 | 8 | 7 | 29 | 3 | 1 | 1 | 0 | 0 | 2 | 0 | 0 | 1 | 0 | 0 |
| **%** | 62.5 | 20 | 17.5 | 87.88 | 9.09 | 3.03 | 100 | 0 | 0 | 100 | 0 | 0 | 100 | 0 | 0 |
| **Ceftazidime** | **No.** | 26 | 2 | 12 | 30 | 3 | 0 | 1 | 0 | 0 | 1 | 0 | 1 | 0 | 0 | 1 |
| **%** | 65 | 5 | 30 | 90.91 | 9.09 | 0 | 100 | 0 | 0 | 50 |  | 50 | 0 | 0 | 100 |
| **Azteronam** | **No.** | 7 | 4 | 29 | 15 | 2 | 16 | 0 | 0 | 1 | 0 | 0 | 2 | 0 | 0 | 1 |
| **%** | 17.5 | 10 | 72.5 | 45.45 | 6.06 | 48.48 | 0 | 0 | 100 | 0 | 0 | 100 | 0 | 0 | 100 |
| **Cefipime** | **No.** | 9 | 2 | 29 | 8 | 2 | 23 | 0 | 0 | 1 | 2 | 0 | 0 | 0 | 0 | 1 |
| **%** | 22.5 | 5 | 72.5 | 24.24 | 6.06 | 69.7 | 0 | 0 | 100 | 100 | 0 | 0 | 0 | 0 | 100 |
| **Imipenem** | **No.** | 10 | 16 | 14 | 17 | 8 | 8 | 1 | 0 | 0 | 0 | 0 | 2 | 1 | 0 | 0 |
| **%** | 25 | 40 | 35 | 51..51 | 24.24 | 24.24 | 100 | 0 | 0 | 0 | 0 | 100 | 100 | 0 | 0 |
| **Meropenem** | **No.** | 11 | 14 | 15 | 11 | 13 | 9 | 1 | 0 | 0 | 0 | 0 | 2 | 1 | 0 | 0 |
| **%** | 27.5 | 35 | 37.5 | 33.33 | 39.39 | 27.27 | 100 | 0 | 0 | 0 | 0 | 100 | 100 | 0 | 0 |
| **Pepracillin-Tazobactam** | **No.** | 8 | 20 | 12 | 18 | 13 | 2 | 1 | 0 | 0 | 1 | 0 | 1 | 0 | 0 | 1 |
| **%** | 20 | 50 | 30 | 54.55 | 39.39 | 6.06 | 100 | 0 | 0 | 50 | 0 | 50 | 0 | 0 | 100 |
| **Amoxicillin-Clavulanate** | **No.** | 30 | 7 | 3 | 22 | 6 | 5 | 1 | 0 | 0 | 2 | 0 | 0 | 1 | 0 | 0 |
| **%** | 75 | 17.5 | 7.5 | 66.67 | 18.18 | 15.15 | 100 | 0 | 0 | 100 | 0 | 0 | 100 | 0 | 0 |
| **Ceftazidime-Avibactam** | **No.** | 8 | 0 | 32 | 8 | 3 | 22 | 1 | 0 | 0 | 1 | 0 | 1 | 0 | 0 | 1 |
| **%** | 20 | 0 | 80 | 24.24 | 9.09 | 66.67 | 100 | 0 | 0 | 50 | 0 | 50 | 0 | 0 | 100 |
| **Colistin** | **No.** | 4 | 0 | 36 | 2 | 0 | 31 | 0 | 0 | 1 | 1 | 0 | 1 | 0 | 0 | 1 |
| **%** | 10 | 0 | 90 | 6.06 | 0 | 93.94 | 0 | 0 | 100 | 50 |  | 50 | 0 | 0 | 100 |
| **Trimethoprim-Sulfamethoxazole** | **No.** | 21 | 11 | 8 | 22 | 6 | 5 | 1 | 0 | 0 | 0 | 0 | 2 | 0 | 0 | 1 |
| **%** | 52.5 | 27.5 | 20 | 66.67 | 18.18 | 15.15 | 100 | 0 | 0 | 0 | 0 | 100 | 0 | 0 | 100 |
| **Ciprofloxacin** | **No.** | 16 | 8 | 16 | 26 | 2 | 5 | 1 | 0 | 0 | 1 | 0 | 1 | 0 | 1 | 0 |
| **%** | 40 | 20 | 40 | 78.79 | 6.06 | 15.15 | 100 | 0 | 0 | 50 |  | 50 | 0 | 100 | 0 |
| **Tigecycline** | **No.** | 21 | 0 | 19 | 20 | 3 | 10 | 1 | 0 | 0 | 1 | 0 | 1 | 0 | 0 | 1 |
| **%** | 52.5 | 0 | 47.5 | 60.6 | 9.09 | 30.3 | 100 | 0 | 0 | 50 | 0 | 50 | 0 | 0 | 100 |
